# Supplementary material for: Native Contact Density and Nonnative Hydrophobic Effects in the Folding of Bacterial Immunity Proteins
Source: PubMed Central journal article supplement (PMC4446218; doi:10.1371/journal.pcbi.1004260), 2015-05-27

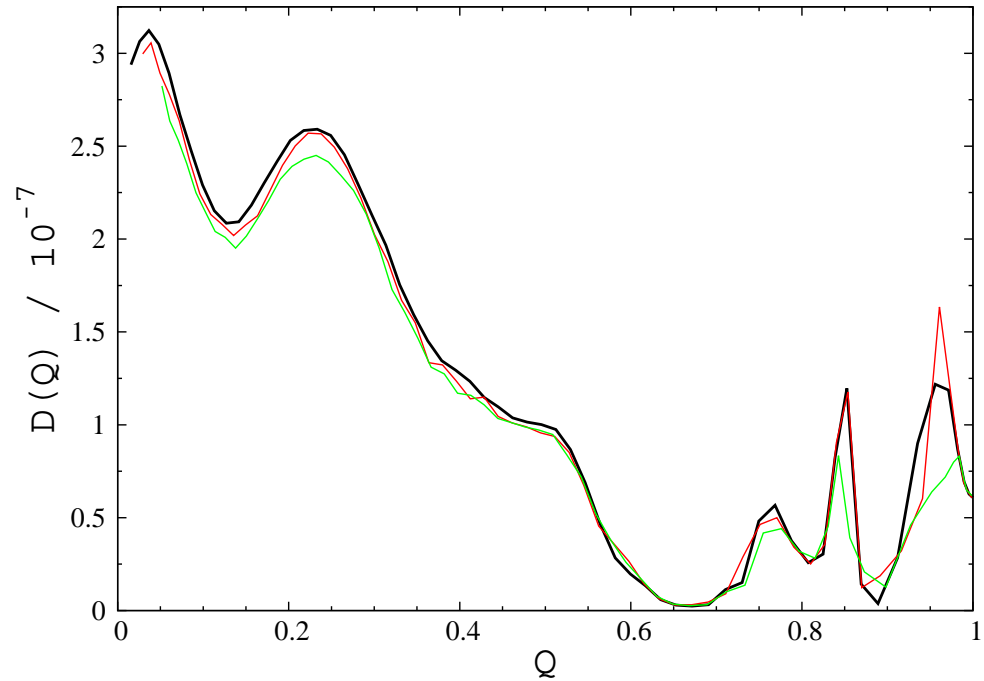

Supplement: pcbi.1004260.s007.pdf [file pcbi.1004260.s007.pdf]
